# Supplementary material for: Computing Optimized Path Integrals for Knapsack Feasibility
Source: Atypon-hosted journal article supplement (doi:10.1287/ijoc.2021.1142), 2022-02-15
Supplement: ijoc.2021.1142.sm1.pdf [file ijoc.2021.1142.sm1.pdf]

## Online Supplement: Detailed Computational Results

**Table 1** Summary of the notation used in the following numerical analysis.

| Abbreviation                  | Meaning                                                                                                     |
|-------------------------------|-------------------------------------------------------------------------------------------------------------|
| $b$                           | Right hand side constraint value                                                                            |
| $n$                           | Size of the coefficient vector $a$                                                                          |
| $r_1$                         | Optimal radius (bypass point) on the positive real axis                                                     |
| $r_2$                         | Optimal radius (bypass point) on the positive imaginary axis                                                |
| $r^*$                         | Optimal radius (bypass point) on the positive real axis                                                     |
| sol                           | Computed (approximate) number of feasible solutions                                                         |
| $\text{sol}_{\text{SP}}^N$    | Computed (approximate) number of feasible solutions using a shortest path with parameters $(N, 0.001, r^*)$ |
| $\text{sol}_{\text{LattE}}$   | Computed (approximate) number of feasible solutions using the LattE software                                |
| $t_{\text{circ}}$             | Total computation time for the circular parameterization                                                    |
| $t_{\text{ellip}}$            | Total computation time for the elliptic parameterization                                                    |
| $t_{\text{SP}}^N$             | Total computation time for the shortest path parameterization with parameters $(N, 0.001, r^*)$             |
| $t_{\text{SPint}}^N$          | Integration time only for the shortest path parameterization with parameters $(N, 0.001, r^*)$              |
| $t_{\text{LattE}}$            | Total computation time using the software LattE                                                             |
| $c_{\text{circ}}$             | Condition number for the circular parameterization                                                          |
| $c_{\text{ellip}}$            | Condition number for the elliptical parameterization                                                        |
| $c_{\text{SP}}^N$             | Condition number for the shortest path parameterization with parameters $(N, 0.001, r^*)$                   |
| $\text{adj}_{\text{SPint}}^N$ | Number of radial adjustments for the shortest path with parameters $(N, 0.001, r^*)$                        |

**Table 2** Overview of the path parameters for the simple geometries, the circle and the ellipse, as well as the two shortest paths on the instances taken from Pisinger (2005). While  $r_1$  parameterizes the circle and the starting point of the shortest paths, both  $r_1$  and  $r_2$  are necessary to parameterize the ellipse. The elliptic path presents significantly smaller condition numbers than the circle, while the shortest paths achieve even smaller condition numbers. Comparing the two shortest paths, the more fine-grained parameterization presents an additional improvement in the condition number, presenting the minimal condition number of all paths presented here as expected.

|     | $r_1$   | $r_2$   | $C_{\text{circ}}$ | $C_{\text{ellip}}$ | $\text{adj}_{\text{SP}}^{36}$ | $C_{\text{SP}}^{36}$ | $\text{adj}_{\text{SP}}^{500}$ | $C_{\text{SP}}^{500}$ |
|-----|---------|---------|-------------------|--------------------|-------------------------------|----------------------|--------------------------------|-----------------------|
| p1  | 0.98962 | 0.99887 | 678655            | 612697             | 40                            | 608288               | 432                            | 600547                |
| p2  | 0.99131 | 0.9963  | 49176             | 36205              | 46                            | 41433                | 366                            | 155863                |
| p3  | 0.99096 | 0.99759 | 271239            | 257825             | 44                            | 252396               | 258                            | 252434                |
| p4  | 0.99074 | 0.99822 | 22999             | 10675              | 48                            | 197617               | 552                            | 642928                |
| p5  | 0.99303 | 0.99745 | 207614            | 183162             | 24                            | 173175               | 208                            | 172550                |
| p6  | 0.99112 | 0.99821 | 779029257         | 778130512          | 32                            | 777281397            | 240                            | 777281340             |
| p7  | 0.99348 | 0.99809 | 2168347           | 1683157            | 30                            | 1718130              | 246                            | 1618354               |
| p8  | 0.99356 | 0.99861 | 68189975          | 66345913           | 28                            | 66499849             | 192                            | 66548927              |
| p9  | 0.99401 | 0.99733 | 6135125           | 5417261            | 18                            | 5206232              | 86                             | 5205048               |
| p10 | 0.99513 | 0.99773 | 56384073          | 55023923           | 16                            | 54470791             | 64                             | 54468836              |
| p11 | 0.99365 | 0.99781 | 45228184538       | 45203883128        | 34                            | 45212704840          | 206                            | 45212672445           |
| p12 | 0.9961  | 0.9985  | 17917502          | 14771042           | 8                             | 14037288             | 16                             | 14036941              |
| p13 | 0.99501 | 0.99837 | 14296550740       | 14257710276        | 10                            | 14250577663          | 18                             | 14250575775           |
| p14 | 0.99551 | 0.99899 | 60901637061       | 60843896655        | 12                            | 60832767794          | 64                             | 60832758832           |
| p15 | 0.9961  | 0.99894 | 2125025756        | 2087465101         | 8                             | 2081446425           | 8                              | 2081445184            |
| p16 | 0.99606 | 0.9985  | 2344359185        | 2283324821         | 8                             | 2269475079           | 12                             | 2269472159            |
| p17 | 0.99571 | 0.99812 | 339691087150      | 339414418877       | 28                            | 339366178574         | 100                            | 339362115922          |
| p18 | 0.99594 | 0.99852 | -                 | -                  | 8                             | 3074645993635        | 8                              | 3074645967170         |
| p19 | 0.99553 | 0.99859 | -                 | -                  | 12                            | 348618396597779      | 24                             | 348618396575776       |
| p20 | 0.99666 | 0.99877 | -                 | -                  | 8                             | 150376189492629      | 28                             | 150376189489663       |
| p21 | 0.99599 | 0.99869 | -                 | -                  | -                             | -                    | -                              | -                     |
| p22 | 0.99616 | 0.99762 | -                 | -                  | 10                            | 697432025032480      | 10                             | 697432024320699       |
| p23 | 0.99637 | 0.99797 | -                 | -                  | 8                             | 156126260246894      | 8                              | 156126260225020       |
| p24 | 0.99624 | 0.99854 | -                 | -                  | -                             | -                    | -                              | -                     |

**Table 3** Overview of the computational results for the simple geometries, the circle and the ellipse, as well as the two shortest paths on the instances taken from Pisinger (2005). The ellipse requires longer computation times for smaller instances, but performs faster on the larger instances when compared to the circle. The shortest paths require longer computation times than the simple geometries on the smaller instances, but outperform the circle and ellipse on the larger instances. Several instances that cannot be solved by the simple geometries can be solved by the shortest paths. While the shortest path with  $N = 500$  angular nodes requires longer computation times for all instances as compared to the parameterization with  $N = 36$  angular nodes, it is able to achieve shorter integration times for some instances, for example *p1*. The integration introduces an error in the larger instances, which is evident in the discrepancies in the approximate solution counts. The computation time for the LattE software exceeds the 300 second time limit for these instances, underlining that these instances are indeed hard to compute.

|     | $sol_{circ}$ | $t_{circ}$ | $sol_{ellip}$ | $t_{ellip}$ | $sol_{SP}^{36}$ | $t_{SP}^{36}$ | $t_{SPint}^{36}$ | $sol_{SP}^{500}$ | $t_{SP}^{500}$ | $t_{SPint}^{500}$ | $sol_{LattE}$ | $t_{LattE}$ |
|-----|--------------|------------|---------------|-------------|-----------------|---------------|------------------|------------------|----------------|-------------------|---------------|-------------|
| p1  | 544429       | 1.49       | 544429        | 1.71        | 544429          | 5.24          | 4.68             | 544429           | 11.65          | 3.75              | -             | >300        |
| p2  | 28060        | 1.62       | 28060         | 1.90        | 28060           | 3.40          | 2.95             | 28060            | 10.10          | 3.33              | -             | >300        |
| p3  | 220560       | 1.34       | 220560        | 1.26        | 220560          | 3.17          | 2.60             | 220560           | 8.53           | 2.41              | -             | >300        |
| p4  | 5502         | 1.34       | 5502          | 1.38        | 5501            | 4.62          | 4.15             | 5502             | 11.05          | 4.38              | -             | >300        |
| p5  | 152417       | 1.50       | 152417        | 2.70        | 152416          | 2.94          | 2.61             | 152417           | 6.97           | 2.47              | -             | >300        |
| p6  | 715681393    | 2.00       | 715681393     | 2.06        | 715681393       | 3.06          | 2.64             | 715681393        | 8.58           | 2.74              | -             | >300        |
| p7  | 1439298      | 2.80       | 1439298       | 2.53        | 1439298         | 4.15          | 3.83             | 1439298          | 8.24           | 3.74              | -             | >300        |
| p8  | 60979453     | 2.66       | 60979453      | 2.83        | 60979453        | 4.77          | 4.46             | 60979453         | 8.54           | 4.04              | -             | >300        |
| p9  | 4849303      | 3.04       | 4849303       | 4.26        | 4849303         | 3.00          | 2.74             | 4849303          | 6.55           | 2.74              | -             | >300        |
| p10 | 50856154     | 5.51       | 50856154      | 3.43        | 50856154        | 3.59          | 3.37             | 50856154         | 6.58           | 3.44              | -             | >300        |
| p11 | 42417243268  | 3.84       | 42417243268   | 3.09        | 42417243269     | 4.83          | 4.51             | 42417243268      | 9.17           | 4.66              | -             | >300        |
| p12 | 13244852     | 5.59       | 13244852      | 5.00        | 13244852        | 3.83          | 3.66             | 13244852         | 6.17           | 3.69              | -             | >300        |
| p13 | 13466832804  | 5.50       | 13466832804   | 4.45        | 13466832804     | 3.48          | 3.26             | 13466832803      | 6.50           | 3.36              | -             | >300        |
| p14 | 57612978960  | 7.37       | 57612978960   | 5.37        | 57612978960     | 5.29          | 5.07             | 57612978959      | 8.18           | 5.02              | -             | >300        |
| p15 | 1981736210   | 5.81       | 1981736210    | 5.13        | 1981736210      | 3.90          | 3.72             | 1981736210       | 6.57           | 4.08              | -             | >300        |
| p16 | 2169533751   | 19.88      | 2169533751    | 11.41       | 2169533751      | 3.81          | 3.64             | 2169533751       | 6.38           | 3.89              | -             | >300        |
| p17 | 324480407213 | 9.84       | 324480407213  | 8.21        | 324480407213    | 5.55          | 5.33             | 324480407213     | 9.53           | 6.36              | -             | >300        |
| p18 | -            | >300       | -             | >300        | 2938495443637   | 3.83          | 3.65             | 2938495443638    | 6.38           | 3.91              | -             | >300        |
| p19 | -            | >300       | -             | >300        | 333806322641172 | 5.32          | 5.10             | 333806322641188  | 8.01           | 4.87              | -             | >300        |
| p20 | -            | >300       | -             | >300        | 144048903115529 | 7.17          | 6.99             | 144048903115544  | 9.20           | 6.73              | -             | >300        |
| p21 | -            | >300       | -             | >300        | -               | >300          | >300             | -                | >300           | >300              | -             | >300        |
| p22 | -            | >300       | -             | >300        | 672271093810708 | 4.47          | 4.30             | 672271093810763  | 7.19           | 4.71              | -             | >300        |
| p23 | -            | >300       | -             | >300        | 150556678598701 | 5.01          | 4.84             | 150556678598714  | 7.52           | 5.05              | -             | >300        |
| p24 | -            | >300       | -             | >300        | -               | >300          | >300             | -                | >300           | >300              | -             | >300        |

**Table 4** Overview of the path parameters for the simple geometries, the circle and the ellipse, as well as the two shortest paths on a set of instances with no solutions. Choosing a smaller  $b$  value will diminish the relative order of the pole at the origin. Dominant poles on the unit circle provide the shortest path with more opportunities to reduce the condition number, which is reflected in the number of adjustments.

|    | $a$                  | $b$ | $r_1$   | $r_2$   | $c_{\text{circ}}$ | $c_{\text{ellip}}$ | $\text{adj}_{\text{SP}}^{36}$ | $c_{\text{SP}}^{36}$ | $\text{adj}_{\text{SP}}^{500}$ | $c_{\text{SP}}^{500}$ |
|----|----------------------|-----|---------|---------|-------------------|--------------------|-------------------------------|----------------------|--------------------------------|-----------------------|
| q1 | [3, 5, 6, 9, 10]     | 1   | 0.53882 | 0.66762 | 2                 | 2                  | 960                           | 2                    | 1330                           | 2                     |
| q2 | [11, 13, 17, 19, 23] | 31  | 0.92388 | 0.98272 | 13                | 7                  | 418                           | 4                    | 656                            | 4                     |
| q3 | [500, 501, ..., 550] | 551 | 0.99259 | 0.99805 | 61                | 22                 | 32                            | 12                   | -                              | -                     |

**Table 5** Overview of the computational results for the simple geometries, the circle and the ellipse, as well as the two shortest paths on a set of instances with no solutions. Making more adjustments increases the computation time of the shortest path, exceeding the time limit for the final instance, which demonstrates an intricate pole structure on the unit circle due to the large number of factors in the coefficient vector. The results for the LattE software are included for reference.

|    | $\text{sol}_{\text{circ}}$ | $t_{\text{circ}}$ | $\text{sol}_{\text{ellip}}$ | $t_{\text{ellip}}$ | $\text{sol}_{\text{SP}}^{36}$ | $t_{\text{SP}}^{36}$ | $t_{\text{SPint}}^{36}$ | $\text{sol}_{\text{SP}}^{500}$ | $t_{\text{SP}}^{500}$ | $t_{\text{SPint}}^{500}$ | $\text{sol}_{\text{LattE}}$ | $t_{\text{LattE}}$ |
|----|----------------------------|-------------------|-----------------------------|--------------------|-------------------------------|----------------------|-------------------------|--------------------------------|-----------------------|--------------------------|-----------------------------|--------------------|
| q1 | 0.00001                    | 0.04              | 0.00002                     | 0.01               | 0.00000                       | 5.09                 | 1.64                    | 0.00000                        | 48.34                 | 2.50                     | 0                           | 0.01               |
| q2 | 0.00002                    | 0.02              | 0.00009                     | 0.04               | 0.09948                       | 1.12                 | 0.64                    | -0.08572                       | 8.28                  | 1.61                     | 0                           | 0.01               |
| q3 | 0.00000                    | 1.00              | 0.00006                     | 1.17               | 0.19306                       | 0.85                 | 0.51                    | -                              | >300                  | >300                     | -                           | >300               |

**Table 6** Path parameterizations and condition numbers for the shortest paths on instances with increasing  $b$  values. As expected, the condition number for the parameterization with  $N = 500$  is considerably smaller for all instances, while the number of adjustments in the path are significantly higher.

| $b$  | $\text{adj}_{\text{SP}}^{36}$ | $c_{\text{SP}}^{36}$ | $\text{adj}_{\text{SP}}^{500}$ | $c_{\text{SP}}^{500}$ |
|------|-------------------------------|----------------------|--------------------------------|-----------------------|
| 50   | 416                           | 634                  | 1962                           | 604                   |
| 100  | 298                           | 38661                | 1420                           | 38193                 |
| 150  | 332                           | 953080               | 986                            | 949750                |
| 200  | 272                           | 13733403             | 860                            | 13623868              |
| 250  | 228                           | 134828544            | 670                            | 134737635             |
| 300  | 204                           | 1014519018           | 572                            | 1014318588            |
| 350  | 180                           | 6389699415           | 488                            | 6187498785            |
| 400  | 166                           | 32910844190          | 462                            | 31900185106           |
| 450  | 148                           | 152339950309         | 376                            | 143249092647          |
| 500  | 114                           | 606976426541         | 370                            | 573273368341          |
| 550  | 104                           | 2189928633123        | 336                            | 2078739683042         |
| 600  | 100                           | 7444688718918        | 382                            | 6924267384509         |
| 650  | 94                            | 22833010488655       | 284                            | 21419757867733        |
| 700  | 98                            | 66952634340672       | 272                            | 62063790182628        |
| 750  | 96                            | 181032537420752      | 258                            | 169725296202847       |
| 800  | 88                            | 609365125506520      | 240                            | 440793071785804       |
| 850  | 86                            | 1338341315912620     | 208                            | 1092689749563940      |
| 900  | 78                            | 2955780219429130     | 194                            | 2596004038988620      |
| 950  | 70                            | 6463996048212330     | 166                            | 5937510299177790      |
| 1000 | 76                            | 13875597544999900    | 214                            | 13108782372348000     |
| 1050 | -                             | -                    | -                              | -                     |

**Table 7** Increasing the  $b$  value increases the size of the pole at the origin. This moves the starting radius further to the boundary, and decreases the number of nodes in the shortest path problem, decreasing the computation time. The two parameterizations produce the exact same solutions for the smaller instances, and begin producing small relative discrepancies for the last few instances. The error pattern is similar to what is observed in Table 2 and results from the error in the numerical integration scheme.

| $b$  | $sol_{SP}^{36}$   | $t_{SP}^{36}$ | $t_{SPint}^{36}$ | $sol_{SP}^{500}$  | $t_{SP}^{500}$ | $t_{SPint}^{500}$ | $sol_{LattE}$ | $t_{LattE}$ |
|------|-------------------|---------------|------------------|-------------------|----------------|-------------------|---------------|-------------|
| 50   | 510               | 3.64          | 0.94             | 510               | 35.90          | 4.94              | 510           | 32.45       |
| 100  | 34434             | 2.92          | 0.88             | 34434             | 27.06          | 4.00              | 34434         | 243.22      |
| 150  | 875553            | 2.37          | 0.97             | 875553            | 22.53          | 3.08              | -             | >300        |
| 200  | 12706352          | 2.08          | 0.95             | 12706352          | 20.32          | 2.94              | -             | >300        |
| 250  | 126508562         | 1.89          | 0.91             | 126508562         | 15.50          | 2.47              | -             | >300        |
| 300  | 956593952         | 1.82          | 0.97             | 956593952         | 12.39          | 1.85              | -             | >300        |
| 350  | 5852912692        | 1.54          | 0.83             | 5852912692        | 11.20          | 1.76              | -             | >300        |
| 400  | 30242661625       | 1.76          | 1.02             | 30242661625       | 10.17          | 1.69              | -             | >300        |
| 450  | 136049809507      | 1.39          | 0.81             | 136049809507      | 10.94          | 1.82              | -             | >300        |
| 500  | 545027910355      | 1.96          | 1.18             | 545027910355      | 11.56          | 1.98              | -             | >300        |
| 550  | 1978312132399     | 1.21          | 0.76             | 1978312132399     | 8.77           | 1.58              | -             | >300        |
| 600  | 6595122641660     | 1.67          | 1.12             | 6595122641660     | 9.95           | 2.14              | -             | >300        |
| 650  | 20413951150269    | 1.69          | 1.11             | 20413951150269    | 9.28           | 1.92              | -             | >300        |
| 700  | 59191214892887    | 1.77          | 1.23             | 59191214892891    | 10.22          | 2.06              | -             | >300        |
| 750  | 161955797166090   | 1.42          | 1.00             | 161955797166113   | 7.78           | 1.95              | -             | >300        |
| 800  | 420735861015145   | 1.31          | 0.95             | 420735861015155   | 6.57           | 1.51              | -             | >300        |
| 850  | 1043161193458690  | 1.23          | 0.90             | 1043161193458690  | 6.01           | 1.41              | -             | >300        |
| 900  | 2479412642859080  | 1.19          | 0.88             | 2479412642859090  | 6.10           | 1.41              | -             | >300        |
| 950  | 5671026462624020  | 1.13          | 0.81             | 5671026462624090  | 5.60           | 1.46              | -             | >300        |
| 1000 | 12523653711398100 | 1.35          | 1.05             | 12523653711398000 | 5.79           | 1.63              | -             | >300        |
| 1050 | -                 | >300          | >300             | -                 | >300           | >300              | -             | >300        |

**Table 8** The  $b$  value is maintained at  $b=200$  while the number of coefficients in the  $a$  vector is increased. The new coefficients are randomly generated in  $[1, 50]$ . This causes the poles on the boundary of the unit disk to increase in size, while the pole at the origin remains constant. Again, the shortest path with more degrees of freedom achieves smaller condition numbers.

| $n$ | $\text{adj}_{\text{SP}}^{36}$ | $c_{\text{SP}}^{36}$ | $\text{adj}_{\text{SP}}^{500}$ | $c_{\text{SP}}^{500}$ |
|-----|-------------------------------|----------------------|--------------------------------|-----------------------|
| 20  | 272                           | 13733403             | 860                            | 13623868              |
| 30  | 400                           | 3416220179           | 982                            | 3414894481            |
| 40  | 672                           | 2018576130445        | 1330                           | 2018339150639         |
| 50  | 684                           | 117363732058470      | 1406                           | 117358635936184       |
| 60  | 740                           | 259247694103850      | 1470                           | 259238025981771       |
| 70  | 754                           | 834172365560111      | 1724                           | 834139231395788       |
| 80  | 760                           | 3420974571790020     | 1878                           | 3420857654483900      |
| 90  | 718                           | 10889817400463400    | 1946                           | 10889564880473200     |
| 100 | -                             | -                    | 1984                           | 457795568727533000    |
| 110 | -                             | -                    | 2206                           | 756858595535446000    |
| 120 | -                             | -                    | -                              | -                     |

**Table 9** The shortest path problem becomes more costly to compute for all parameterizations as the size of the poles on the boundary of the unit disk increases. Lower condition numbers can be achieved by carefully circumventing the poles. While avoiding the poles decreases the condition number significantly, the computation time increases when increasing the degrees of freedom in the shortest path parameterization. Nevertheless, the lower condition numbers ultimately permits additional instances to converge in the numerical integration. The LattE code does not solve the instances within the time limit, but the time for the first instance is included for reference.

| $n$ | $\text{sol}_{\text{SP}}^{36}$ | $t_{\text{SP}}^{36}$ | $t_{\text{SPint}}^{36}$ | $\text{sol}_{\text{SP}}^{500}$ | $t_{\text{SP}}^{500}$ | $t_{\text{SPint}}^{500}$ | $\text{sol}_{\text{LattE}}$ | $t_{\text{LattE}}$ |
|-----|-------------------------------|----------------------|-------------------------|--------------------------------|-----------------------|--------------------------|-----------------------------|--------------------|
| 20  | 12706352                      | 1.99                 | 0.92                    | 12706352                       | 15.37                 | 2.22                     | 12706352                    | (767.20)           |
| 30  | 3231494637                    | 3.18                 | 1.38                    | 3231494637                     | 26.8                  | 2.63                     | -                           | >300               |
| 40  | 1926080459195                 | 4.60                 | 1.75                    | 1926080459195                  | 42.05                 | 3.53                     | -                           | >300               |
| 50  | 112741441577786               | 5.95                 | 1.92                    | 112741441577787                | 59.68                 | 4.16                     | -                           | >300               |
| 60  | 249378103539524               | 7.46                 | 2.27                    | 249378103539526                | 72.86                 | 4.41                     | -                           | >300               |
| 70  | 802703537456477               | 8.24                 | 2.33                    | 802703537456480                | 85.42                 | 5.19                     | -                           | >300               |
| 80  | 3293394167012470              | 9.45                 | 2.48                    | 3293394167012480               | 100.74                | 5.94                     | -                           | >300               |
| 90  | 10497306954818300             | 10.79                | 2.62                    | 10497306954818300              | 117.89                | 6.43                     | -                           | >300               |
| 100 | -                             | >300                 | >300                    | 442500538243987000             | 142.45                | 7.17                     | -                           | >300               |
| 110 | -                             | >300                 | >300                    | 731645471006155000             | 168.69                | 9.03                     | -                           | >300               |
| 120 | -                             | >300                 | >300                    | -                              | >300                  | >300                     | -                           | >300               |
